# Supplementary material for: A Clinical Trial of a Whole-Virus H5N1 Vaccine Derived from Cell Culture
Source: Atypon-hosted journal article supplement (doi:10.1056/nejmoa073121), 2008-06-11
Supplement: nejm_ehrlich_2573sa1.pdf [file nejm_ehrlich_2573sa1.pdf]

## Supplementary Appendix

This appendix has been provided by the authors to give readers additional information about their work.

Supplement to: Ehrlich HJ, Müller M, Oh HML, et al. A clinical trial of a whole-virus H5N1 vaccine derived from cell culture. *N Engl J Med* 2008;358:2573-84.

## **Supplementary Appendix**

### **METHODS**

#### **Vaccine**

The wild type strain used (A/Vietnam/1203/2004) was an egg-adapted isolate. The original clinical material was isolated in embryonated hens' eggs and had 2 additional passages in eggs. This material was then passaged 3 times in Baxter's serum protein-free Vero cells for production of a seed virus bank which was used for production of the vaccine bulk material.

In total, the virus used for vaccine production had 3 passages in embryonated hens' eggs and 4 passages in serum protein-free Vero cells.

HA antigen content of the vaccine is determined by single-radial-immunodiffusion (SRD).

The SRD assay allows precise hemagglutinin (HA) antigen quantification in any type of influenza vaccine i.e. whole virus, split (subvirion), subunit, or virosome<sup>1,2,3,4,5</sup>. Lysis of vaccine preparations with detergent (e.g. Zwittergent) enables HA molecules to diffuse into agarose gel plates and to react with antibodies to form complexes (visible as zones) which are stained to allow quantification. Thus, 15 µg HA in the presented whole virus vaccine is the same as 15 µg HA in a subunit vaccine.

### **Randomization, Cohort Allocation and Follow-Up**

Subject assignment to a particular cohort was in order of enrollment. The staff involved in the conduct of the study was blinded to study group and clinical safety data remained blinded until the database had been cleaned and closed. Investigators were partially blinded, meaning that they were blinded within the respective dosing cohorts. Unblinded safety data from Cohorts 1a, 1b, 2 and 3 were provided to the independent Data Safety Monitoring Board (DSMB) while it was ensured that study monitors, data managers and other staff involved in the conduct of the study as well as laboratory personnel remained blinded.

The lowest dose of 3.75 µg HA antigen was included in the study to investigate its immunogenicity rather than for safety reasons. Therefore, the 3.75 µg dose and the 7.5 µg doses (with and without adjuvant) were administered in parallel to subjects in the first cohort, as even the 7.5 µg dose contains a considerably lower level of antigen than conventional trivalent interpandemic influenza vaccines (45 µg total HA antigen content).

Cohort 1 consisted of approximately 135 subjects randomized 1:1:1 to receive either 3.75 µg or 7.5 µg of alum adjuvanted H5N1 HA antigen, or 7.5 µg in a non-adjuvanted formulation. It was deemed acceptable to proceed with the two lowest doses simultaneously in Cohort 1 as each contains a considerably lower level of antigen than conventional trivalent interpandemic

influenza vaccines (45 µg total HA antigen content). Cohort 1 was further subdivided into two sub-cohorts identified as Cohorts 1a and 1b for safety monitoring purposes.

Cohort 1a consisted of approximately 30 subjects randomized in equal numbers to one of the three arms in Cohort 1. Unblinded safety data obtained at Day 3 after the first vaccination in Cohort 1a were reviewed by the independent DSMB and permission obtained to (i) recruit the remaining approximately 105 subjects into Cohort 1b and (ii) administer the second vaccination to Cohort 1a at Day 21. Seven days after the first vaccination in Cohort 1b, the unblinded safety data were again reviewed by the DSMB and permission obtained to proceed to Cohort 2.

Approximately 90 subjects (Cohort 2) were randomized 1:1 to receive 2 injections of 15 µg H5N1 HA antigen formulated with alum adjuvant or the same dose of antigen without adjuvant. Unblinded safety data from Cohort 2 through the seventh day after the first vaccination were reviewed and evaluated by the DSMB. Upon review of these data the DSMB raised no objection to the study continuing for enrollment of the third and final cohort.

Approximately 45 subjects were enrolled into Cohort 3 and received the first vaccination containing 30 µg of HA antigen in combination with an alum adjuvant. Safety data from Cohort 3 (through the seventh day after the first vaccination) were reviewed and evaluated by

the DSMB. Upon review of these data the DSMB raised no objection to the study continuing with the second vaccination.

### **Assays**

Hemagglutination inhibition assays were done according to established procedures, using horse erythrocytes and Madin-Darby canine kidney (MDCK) cell derived antigen from the A/Vietnam/1203/2004 reverse genetics derived attenuated virus RG VN1203<sup>6</sup>. These were carried out at AnDiaTec, Stuttgart, Germany. Virus neutralization assays were performed using wild type H5N1 influenza strains A/Vietnam/1203/2004 (vaccine strain), A/Hong Kong/156/1997 (clade 3) and A/Indonesia/05/2005 (clade 2). Serum samples were initially diluted 1:5 and then serially diluted in two fold steps with cell culture medium. The dilutions were then mixed at a ratio of 1:1 with the appropriate virus strain (100 TCID<sub>50</sub> per well) and transferred to a microtiter plate with a Vero cell monolayer. After 5 days incubation at 37°C, the cultures were inspected for cytopathic effect. The neutralizing titer, expressed as the reciprocal of antiserum dilution at which virus growth is inhibited by 50%, was calculated by the number of virus negative wells and the serum dilution according to the method of Reed and Muench<sup>7</sup>. On this basis, negative sera were assigned a nominal value of 3.9. Single radial

hemolysis (SRH) was carried out at the Laboratory of Molecular Epidemiology, University of Siena, Italy according to published methods<sup>8</sup>.

### **Statistical Analysis**

The number of subjects with local reactions as well as the number of subjects with systemic reactions within 7 days after vaccination were compared between the different vaccine formulations by likelihood ratio chi-square test. The analyses were carried out separately for the 1<sup>st</sup> and 2<sup>nd</sup> vaccinations.

Changes from baseline in the log-transformed neutralization (NT) antibody titers and SRH values were analyzed by a mixed model accounting for the effects of vaccine group, time, age, sex, vaccine formulation - day interaction and baseline neutralization antibody titer. A compound symmetry covariance structure was assumed and the Kenwood-Roger correction for the degrees of freedom was applied.<sup>9</sup>

The geometric mean of the NT titer and SRH fold increases (GMI) from baseline and their 95% confidence intervals were computed for each strain, vaccine group and time point separately (back-computed by exponentiation from the mean differences of the log-transformed values), within the same mixed model analysis framework. Results are presented

in Table 2. The model-adjusted point estimates and 95% confidence intervals are very close to the empirical ones presented in the manuscript (see Manuscript Table 3).

Non-adjuvanted vaccine formulations were contrasted to the adjuvanted ones within the same model. P-value is presented in the manuscript (see Manuscript Table 4). The 7.5 µg and 15 µg non-adjuvanted vaccine formulations were also compared. P-values are presented in the manuscript (see Manuscript Table 4). The ratios of geometric means corresponding to these contrasts are presented in Table 3.

Results of the pairwise comparisons between adjuvanted vaccine formulations (using virus neutralization antibody titer measurements) are presented in Table 4.

Results of the analyses of SRH values are presented in Tables 5A and 5B. Dose groups within the adjuvanted and non-adjuvanted preparations were also contrasted. Comparing the adjuvanted formulations' multiplicity for the 6 pairwise comparisons was considered.

The rate of subjects with NT titer of  $\geq 1:20$  and the rate of subjects with SRH results  $\geq 25 \text{ mm}^2$  were analyzed by generalized linear model with repeated measurements. Log link function was used and the General Estimating Equations (GEE) method was applied, using proc genmod of SAS statistical package. The explanatory variables were: vaccine group,

baseline seroprotection, sex, age and day. An autoregressive correlation structure was assumed. Differences between vaccine groups and their 95% CIs were computed within this model. GEE estimates were then back-transformed to the original scale by exponentiation.

Results are presented in Tables 6 and 7.

## **RESULTS**

### **Demographic Characteristics**

A total of 284 subjects were enrolled in the study; 275 subjects received the first vaccination (9 subjects were enrolled but not vaccinated). The Austrian study site (Vienna) enrolled the highest number of subjects (160/275). The two study sites in Singapore (Singapore NUH and Singapore CGH) enrolled 47/275 and 68/275 subjects, respectively (see Table 1 ).

Seventeen subjects did not come back for the Day 21 blood draw; these subjects were included in the safety (275 subjects) but excluded from the immunogenicity dataset (258 subjects) for the first vaccination. A total of 257 subjects received the second vaccination.

Eight subjects did not come back for the Day 42 blood draw. Therefore the immunogenicity dataset for the second vaccination comprises 249 subjects.

Slightly more male subjects (143 for the first vaccination and 137 for the second vaccination) than female subjects (115 for the first vaccination and 112 for the second vaccination) were

included in the immunogenicity dataset. Also for the safety dataset, slightly more male subjects (156 and 143 for the first and second vaccination, respectively) than female subjects (119 and 114, respectively) were included in the evaluation.

The largest number of subjects in both immunogenicity and safety datasets were aged 18 to 25 years; the second largest number of subjects were aged 26 to 30 years. The majority of subjects weighed between  $\leq 60$  kg to 70 kg and were between 161 and 180 cm tall.

Distributions of age, height and weight were well balanced between the three cohorts.

## **DISCUSSION**

### **Comments on Whole Virus Seasonal Influenza Vaccine**

Historically, use of whole virus seasonal influenza vaccines was discontinued largely due to their reactogenicity profile in children. A seasonal whole virus vaccine which was developed using the technology described here was also significantly more reactogenic in adult populations than the H5N1 vaccine described here. The lower reactogenicity of the H5N1 vaccine may be due the absence of an Influenza B strain in the vaccine. Pro-inflammatory cytokine studies (data unpublished) indicated that the B strain in the trivalent seasonal vaccine was largely responsible for inducing such cytokine responses. This hypothesis is also

supported by reports that an egg-derived monovalent B vaccine induced much higher rates of systemic reactions than a monovalent A vaccine in human volunteers.<sup>10</sup>

## References

- 1 Wood JM, Schild GC, Newman RW, Seagroatt V. An improved single-radial-immunodiffusion technique for the assay of influenza haemagglutinin antigen: application for potency determinations of inactivated whole virus and subunit vaccines. *J Biol Stand* 1977; 5: 237-47.
- 2 Influenza vaccine (split virion, inactivated); Ph. Eur. 01/2006:0158,  
[www.edqm.eu/site/](http://www.edqm.eu/site/)
- 3 Influenza vaccine (whole virion, inactivated); Ph. Eur. 01/2006:0159,  
[www.edqm.eu/site/](http://www.edqm.eu/site/)
- 4 Influenza vaccine (surface antigen, inactivated); Ph. Eur. 01/2006:0869,  
[www.edqm.eu/site/](http://www.edqm.eu/site/)

- 5 Influenza vaccine (surface antigen, inactivated, virosome); Ph. Eur. 01/2006:2053,  
  
[www.edqm.eu/site/](http://www.edqm.eu/site/)
- 6 Stephenson I, Wood JM, Nicholson KG, Charlett A, Zambon MC. Detection of anti-H5 responses in human sera by HI using horse erythrocytes following MF59-  
  
adjuvanted influenza A/Duck/Singapore/97 vaccine. *Virus Res* 2004; 103: 91-5.
- 7 Reed LJ, Muench H. A simple method of estimating fifty percent endpoints. *Am J Hyg* 1938; 27: 493-7.
- 8 Schild GC, Pereira MS, Chakraverty P. Single-radial-haemolysis: a new method for the assay of antibody to influenza haemagglutinin. *Bull World Health Organ* 1975; 52: 43-50.
- 9 Collett D. Fitting a model that contains a random effect. In *Modeling Binary Data*. 1991; pp. 207-212. Chapman and Hall/CRC Press, Boca Raton, FL.
- 10 Gwaltney JM, DeSanctis AN, Metzgar DP, Hendley O. Systemic Reactions to Influenza B vaccine. *American J Epidemiol* 1977; 105: 252-60.

**Table 1.** Number of subjects enrolled and vaccinated (first vaccination) in each study center

| Study group                 | Study center |         |               |         |               |         | Total |
|-----------------------------|--------------|---------|---------------|---------|---------------|---------|-------|
|                             | Vienna       |         | Singapore NUH |         | Singapore CGH |         |       |
|                             | N            | %       | N             | %       | N             | %       |       |
| <b>3.75µg adjuvanted</b>    | 31           | (68.9%) | 6             | (13.3%) | 8             | (17.8%) | 45    |
| <b>7.5µg adjuvanted</b>     | 28           | (62.2%) | 7             | (15.6%) | 10            | (22.2%) | 45    |
| <b>7.5µg non-adjuvanted</b> | 34           | (75.6%) | 2             | (4.4%)  | 9             | (20.0%) | 45    |
| <b>15µg adjuvanted</b>      | 27           | (58.7%) | 8             | (17.4%) | 11            | (23.9%) | 46    |
| <b>15µg non-adjuvanted</b>  | 23           | (51.1%) | 7             | (15.6%) | 15            | (33.3%) | 45    |
| <b>30µg adjuvanted</b>      | 17           | (34.7%) | 17            | (34.7%) | 15            | (30.6%) | 49    |
| <b>Total</b>                | 160          | (58.2%) | 47            | (17.1%) | 68            | (24.7%) | 275   |

**Table 2.** Virus neutralization antibody titers - geometric mean of the fold increase (GMI) from baseline estimated from the repeated mixed model ANCOVA\*

| Strain<br>/<br>Day                   | Study Group       |     |             |                  |     |             |                      |     |             |                 |     |             |                     |     |              |                 |     |             |  |
|--------------------------------------|-------------------|-----|-------------|------------------|-----|-------------|----------------------|-----|-------------|-----------------|-----|-------------|---------------------|-----|--------------|-----------------|-----|-------------|--|
|                                      | 3.75µg adjuvanted |     |             | 7.5µg adjuvanted |     |             | 7.5µg non-adjuvanted |     |             | 15µg adjuvanted |     |             | 15µg non-adjuvanted |     |              | 30µg adjuvanted |     |             |  |
|                                      | N                 | GMI | 95% C.I.    | N                | GMI | 95% C.I.    | N                    | GMI | 95% C.I.    | N               | GMI | 95% C.I.    | N                   | GMI | 95% C.I.     | N               | GMI | 95% C.I.    |  |
| <b>A/Vietnam/1203/2004, clade 1</b>  |                   |     |             |                  |     |             |                      |     |             |                 |     |             |                     |     |              |                 |     |             |  |
| 21                                   | 42                | 2.0 | (1.6 ; 2.5) | 42               | 2.2 | (1.8 ; 2.7) | 42                   | 3.4 | (2.7 ; 4.2) | 43              | 1.9 | (1.6 ; 2.4) | 43                  | 3.1 | (2.5 ; 3.9)  | 46              | 2.0 | (1.6 ; 2.5) |  |
| 42                                   | 42                | 4.5 | (3.6 ; 5.6) | 39               | 4.3 | (3.4 ; 5.3) | 42                   | 5.6 | (4.5 ; 7.0) | 41              | 4.0 | (3.3 ; 5.0) | 41                  | 5.6 | (4.5 ; 7.0)  | 44              | 4.4 | (3.6 ; 5.4) |  |
| <b>A/Indonesia/05/2005, clade 2</b>  |                   |     |             |                  |     |             |                      |     |             |                 |     |             |                     |     |              |                 |     |             |  |
| 21                                   | 42                | 1.7 | (1.4 ; 2.0) | 42               | 1.6 | (1.4 ; 2.0) | 42                   | 2.4 | (2.0 ; 2.8) | 43              | 1.4 | (1.1 ; 1.6) | 43                  | 2.2 | (1.9 ; 2.7)  | 46              | 1.8 | (1.5 ; 2.1) |  |
| 42                                   | 42                | 2.8 | (2.3 ; 3.4) | 39               | 2.7 | (2.3 ; 3.3) | 42                   | 3.3 | (2.8 ; 4.0) | 41              | 2.4 | (2.0 ; 2.9) | 41                  | 3.5 | (2.9 ; 4.2)  | 44              | 3.0 | (2.5 ; 3.5) |  |
| <b>A/Hong Kong/156/1997, clade 3</b> |                   |     |             |                  |     |             |                      |     |             |                 |     |             |                     |     |              |                 |     |             |  |
| 21                                   | 42                | 2.1 | (1.7 ; 2.7) | 42               | 2.3 | (1.8 ; 3.0) | 42                   | 3.6 | (2.8 ; 4.7) | 43              | 2.1 | (1.6 ; 2.6) | 43                  | 3.3 | (2.6 ; 4.3)  | 46              | 2.0 | (1.6 ; 2.5) |  |
| 42                                   | 42                | 5.4 | (4.2 ; 6.9) | 39               | 5.4 | (4.2 ; 7.0) | 42                   | 6.3 | (4.9 ; 8.1) | 41              | 5.1 | (3.9 ; 6.5) | 41                  | 7.8 | (6.1 ; 10.0) | 44              | 5.9 | (4.6 ; 7.5) |  |

\*Mixed model accounting for the following fixed effects: vaccine group, day, age, sex, vaccine group-day interaction, baseline neutralization antibody titer and for random subject effect

**Table 3.** Ratio of Geometric Mean Fold Increases (GMI) from baseline of virus neutralization antibody titer values

| <b>Contrast</b>                        | <b>Strain</b>               | <b>Ratio of GMIs</b> | <b>95% CI</b> |
|----------------------------------------|-----------------------------|----------------------|---------------|
| <b>Adjuvanted vs. non-adjuvanted</b>   | <i>A/Vietnam/1203/2004</i>  | 0.7                  | (0.6 ; 0.8)   |
|                                        | <i>A/Indonesia/05/2005</i>  | 0.7                  | (0.6 ; 0.9)   |
|                                        | <i>A/Hong Kong/156/1997</i> | 0.7                  | (0.6 ; 0.8)   |
| <b>Non-adjuvanted 7.5 µg vs. 15 µg</b> | <i>A/Vietnam/1203/2004</i>  | 1.0                  | (0.8 ; 1.4)   |
|                                        | <i>A/Indonesia/05/2005</i>  | 1.0                  | (0.8 ; 1.3)   |
|                                        | <i>A/Hong Kong/156/1997</i> | 0.9                  | (0.7 ; 1.3)   |

**Table 4.** Pair wise comparisons between adjuvanted vaccine formulations (using virus neutralization antibody titer measurements)

| Contrast                   | P-value*            |                     |                      |
|----------------------------|---------------------|---------------------|----------------------|
|                            | A/Vietnam/1203/2004 | A/Indonesia/05/2005 | A/Hong Kong/156/1997 |
| Adjuvanted 3.75 vs. 7.5 µg | 0.957               | 0.784               | 0.794                |
| Adjuvanted 3.75 vs. 15 µg  | 0.566               | 0.120               | 0.757                |
| Adjuvanted 3.75 vs. 30 µg  | 0.894               | 0.672               | 0.964                |
| Adjuvanted 7.5 vs. 15 µg   | 0.533               | 0.203               | 0.568                |
| Adjuvanted 7.5 vs. 30 µg   | 0.853               | 0.485               | 0.825                |
| Adjuvanted 15 vs. 30 µg    | 0.652               | 0.044               | 0.717                |

\*Applying a Bonferroni-correction for multiplicity, p-values above 0.0028 (=0.05/18) have to be considered significant

**Table 5.** Results of the mixed model analysis performed on the log-transformed SRH changes from baseline **A)** P-values and **B)** Ratio of Geometric Mean Fold Increases (GMI)

A)

| Effect / Contrast             | A/Vietnam/1203/2004<br>P-value |
|-------------------------------|--------------------------------|
| <b>Effects</b>                |                                |
| Vaccine formulation           | <0.001                         |
| Day (d 21 vs d 42)            | <0.001                         |
| Baseline                      | <0.001                         |
| Sex                           | 0.094                          |
| Age                           | 0.794                          |
| Vaccine formulation - day     | 0.062                          |
| <b>Contrasts</b>              |                                |
| Adjuvanted vs. non-adjuvanted | <0.001                         |
| Non-adjuvanted 7.5 vs. 15 µg  | 0.052                          |

B)

| Contrasts                     | A/Vietnam/1203/2004<br>Ratio of GMIs<br>(95% CI) |             |
|-------------------------------|--------------------------------------------------|-------------|
| Adjuvanted vs. non-adjuvanted | 0.5                                              | (0.4 ; 0.6) |
| Non-adjuvanted 7.5 vs. 15 µg  | 1.5                                              | (1.0 ; 2.3) |

**Table 6.** Rate of subjects with virus neutralization antibody titer  $\geq 1:20$ 

| Strain                   | Comparison                                            | Ratio of Seroprotection Rates | 95% CI        | P-value |
|--------------------------|-------------------------------------------------------|-------------------------------|---------------|---------|
| <b>Vietnam/1203/2004</b> | 3.75 $\mu\text{g}$ + Al vs. 30 $\mu\text{g}$ + Al     | 1.02                          | (0.77 ; 1.35) | 0.915   |
|                          | 7.5 $\mu\text{g}$ + Al vs. 30 $\mu\text{g}$ + Al      | 0.94                          | (0.69 ; 1.26) | 0.660   |
|                          | 7.5 $\mu\text{g}$ vs. 30 $\mu\text{g}$ + Al           | 1.15                          | (0.89 ; 1.49) | 0.293   |
|                          | 15 $\mu\text{g}$ + Al vs. 30 $\mu\text{g}$ + Al       | 0.90                          | (0.66 ; 1.23) | 0.522   |
|                          | 15 $\mu\text{g}$ vs. 30 $\mu\text{g}$ + Al            | 1.09                          | (0.83 ; 1.44) | 0.527   |
|                          | Baseline seroprotection (Yes vs. No)                  | 1.77                          | (1.42 ; 2.20) | <0.001  |
|                          | Sex (Male vs. Female)                                 | 0.85                          | (0.72 ; 1.00) | 0.053   |
|                          | Age                                                   | 0.99                          | (0.98 ; 1.00) | 0.074   |
|                          | Day (42 vs. 21)                                       | 2.53                          | (2.09 ; 3.06) | <0.001  |
|                          | Adjuvanted vs. non-adjuvanted                         | 0.86                          | (0.73 ; 1.01) | 0.074   |
|                          | Non-adjuvanted 7.5 $\mu\text{g}$ vs. 15 $\mu\text{g}$ | 1.05                          | (0.82 ; 1.35) | 0.693   |
| <b>Indonesia/05/2005</b> | 3.75 $\mu\text{g}$ + Al vs. 30 $\mu\text{g}$ + Al     | 0.80                          | (0.41 ; 1.56) | 0.509   |
|                          | 7.5 $\mu\text{g}$ + Al vs. 30 $\mu\text{g}$ + Al      | 1.07                          | (0.57 ; 1.99) | 0.840   |
|                          | 7.5 $\mu\text{g}$ vs. 30 $\mu\text{g}$ + Al           | 1.55                          | (0.89 ; 2.72) | 0.124   |
|                          | 15 $\mu\text{g}$ + Al vs. 30 $\mu\text{g}$ + Al       | 0.31                          | (0.10 ; 0.94) | 0.039   |
|                          | 15 $\mu\text{g}$ vs. 30 $\mu\text{g}$ + Al            | 1.31                          | (0.72 ; 2.38) | 0.383   |
|                          | Baseline seroprotection (Yes vs. No)                  | 3.04                          | (1.91 ; 4.84) | <0.001  |
|                          | Sex (Male vs. Female)                                 | 0.61                          | (0.42 ; 0.89) | 0.009   |
|                          | Age                                                   | 0.99                          | (0.97 ; 1.02) | 0.555   |
|                          | Day (42 vs. 21)                                       | 2.28                          | (1.71 ; 3.03) | <0.001  |
|                          | Adjuvanted vs. non-adjuvanted                         | 0.50                          | (0.34 ; 0.75) | <0.001  |
|                          | Non-adjuvanted 7.5 $\mu\text{g}$ vs. 15 $\mu\text{g}$ | 1.19                          | (0.73 ; 1.92) | 0.482   |

| Strain                     | Comparison                           | Ratio of Seroprotection Rates | 95% CI        | P-value |
|----------------------------|--------------------------------------|-------------------------------|---------------|---------|
| <b>Hong Kong /156/1997</b> | 3.75 µg + Al vs. 30 µg + Al          | 0.87                          | (0.67 ; 1.12) | 0.284   |
|                            | 7.5 µg + Al vs. 30 µg + Al           | 0.84                          | (0.66 ; 1.09) | 0.188   |
|                            | 7.5 µg vs. 30 µg + Al                | 0.98                          | (0.78 ; 1.23) | 0.857   |
|                            | 15 µg + Al vs. 30 µg + Al            | 0.83                          | (0.64 ; 1.08) | 0.169   |
|                            | 15 µg vs. 30 µg + Al                 | 1.04                          | (0.83 ; 1.29) | 0.754   |
|                            | Baseline seroprotection (Yes vs. No) | 1.55                          | (1.33 ; 1.80) | <0.001  |
|                            | Sex (Male vs. Female)                | 0.89                          | (0.77 ; 1.04) | 0.136   |
|                            | Age                                  | 0.99                          | (0.98 ; 1.00) | 0.025   |
|                            | Day (42 vs. 21)                      | 2.28                          | (1.93 ; 2.70) | <0.001  |
|                            | Adjuvanted vs. non-adjuvanted        | 0.88                          | (0.76 ; 1.02) | 0.082   |
|                            | Non-adjuvanted 7.5 µg vs. 15 µg      | 0.95                          | (0.75 ; 1.19) | 0.631   |

**Table 7.** Rate of subjects with Single Radial Hemolysis (SRH) area  $\geq 25 \text{ mm}^2$ 

| <b>A/Vietnam/1203/2004</b>                            |                                       |               |                |
|-------------------------------------------------------|---------------------------------------|---------------|----------------|
| <b>Comparison</b>                                     | <b>Ratio of sero-protection rates</b> | <b>95% CI</b> | <b>P-value</b> |
| 3.75 $\mu\text{g}$ + Al vs. 30 $\mu\text{g}$ + Al     | 0.90                                  | (0.62 ; 1.30) | 0.563          |
| 7.5 $\mu\text{g}$ + Al vs. 30 $\mu\text{g}$ + Al      | 0.71                                  | (0.45 ; 1.11) | 0.133          |
| 7.5 $\mu\text{g}$ vs. 30 $\mu\text{g}$ + Al           | 1.40                                  | (1.04 ; 1.89) | 0.024          |
| 15 $\mu\text{g}$ + Al vs. 30 $\mu\text{g}$ + Al       | 0.72                                  | (0.47 ; 1.09) | 0.118          |
| 15 $\mu\text{g}$ vs. 30 $\mu\text{g}$ + Al            | 1.12                                  | (0.79 ; 1.58) | 0.537          |
| Baseline seroprotection (Yes vs. No)                  | 1.82                                  | (1.48 ; 2.23) | <0.001         |
| Sex (Male vs. Female)                                 | 0.92                                  | (0.76 ; 1.13) | 0.442          |
| Age                                                   | 1.00                                  | (0.99 ; 1.02) | 0.659          |
| Day (42 vs. 21)                                       | 1.48                                  | (1.32 ; 1.66) | <0.001         |
| Adjuvanted vs. non-adjuvanted                         | 0.66                                  | (0.53 ; 0.81) | <0.001         |
| Non-adjuvanted 7.5 $\mu\text{g}$ vs. 15 $\mu\text{g}$ | 1.26                                  | (0.95 ; 1.67) | 0.111          |
